# Supplementary material
Source: Research Square preprint supplement (doi:10.21203/rs.3.rs-7014690/v1)
Supplement: Supplementary file 1 [file 709a2131d369cb098c6aaf51.xlsx]

## Sheet: 总表
Sample	Non-DS／DS	Scoliosis severity	Convexity direction	Avg LCSA/GCSA	Convex LCSA/GCSA	Concave LCSA/GCSA	MF Total CSA	MF Avg CSA	MF Convex CSA	MF Concave CSA
1	1	Mild	Right	0.64	0.659	0.621	1072	536	545	527
2	1	Mild	Right	0.474	0.528	0.419	710	355	373	337
3	1	Mild	Left	0.594	0.636	0.552	567	283	304	263
4	1	Mild	Right	0.59	0.625	0.556	941	470	485	456
5	1	Mild	Left	0.576	0.618	0.533	1015	507	519	496
6	1	Mild	Left	0.78	0.818	0.741	670	335	359	311
7	1	Mild	Left	0.631	0.673	0.588	1024	512	558	466
8	1	Moderate	Left	0.649	0.759	0.538	952	476	485	467
9	1	Mild	Left	0.82	0.875	0.764	1252	626	698	554
10	1	Mild	Left	0.734	0.786	0.683	1060	530	599	461
11	1	Moderate	Left	0.618	0.686	0.551	676	338	360	316
12	1	Mild	Left	0.65	0.827	0.473	1199	599	641	558
13	1	Mild	Right	0.646	0.724	0.567	1070	535	598	472
14	1	Moderate	Left	0.566	0.6	0.533	958	479	533	425
15	1	Moderate	Left	0.546	0.616	0.477	580	290	326	254
16	1	Mild	Right	0.604	0.651	0.556	1012	506	651	361
17	1	Mild	Right	0.768	0.831	0.706	2096	1048	1106	990
18	1	Moderate	Left	0.648	0.703	0.592	1022	511	544	478
19	1	Severe	Left	0.647	0.693	0.601	1144	572	596	548
20	1	Moderate	Left	0.622	0.674	0.57	855	427	477	378
21	1	Mild	Left	0.591	0.658	0.524	758	379	406	352
22	1	Mild	Right	0.581	0.642	0.52	901	450	507	394
23	1	Mild	Right	0.73	0.77	0.689	1202	601	637	565
24	1	Moderate	Left	0.576	0.605	0.547	706	353	389	317
25	1	Mild	Left	0.786	0.813	0.76	1250	625	635	615
26	1	Mild	Left	0.784	0.8	0.769	883	441	476	407
27	1	Mild	Left	0.717	0.735	0.699	943	471	489	454
28	1	Moderate	Left	0.466	0.417	0.514	520	260	228	292
29	1	Mild	Right	0.636	0.641	0.631	784	392	323	461
30	1	Mild	Right	0.776	0.846	0.707	1954	977	1037	917
31	1	Mild	Left	0.566	0.601	0.53	902	451	421	481
32	1	Mild	Right	0.634	0.663	0.604	999	499	564	435
33	1	Mild	Left	0.527	0.596	0.458	486	243	226	260
34	1	Mild	Left	0.482	0.492	0.472	793	396	396	397
35	1	Mild	Right	0.656	0.715	0.598	656	328	368	288
36	1	Mild	Left	0.764	0.762	0.765	1240	620	572	668
37	1	Mild	Left	0.468	0.459	0.477	760	380	405	355
38	1	Mild	Left	0.608	0.644	0.572	648	324	352	296
39	1	Mild	Left	0.648	0.647	0.648	591	295	285	306
40	1	Mild	Left	0.805	0.817	0.793	1370	685	730	640
41	1	Mild	Right	0.69	0.75	0.63	756	378	423	333
42	1	Mild	Left	0.612	0.649	0.576	1020	510	574	446
43	1	Mild	Right	0.678	0.733	0.624	1431	715	774	657
44	1	Mild	Left	0.487	0.555	0.418	496	248	302	194
45	1	Mild	Left	0.662	0.693	0.632	589	294	308	281
46	1	Mild	Left	0.56	0.592	0.528	731	365	393	338
47	1	Mild	Right	0.68	0.7	0.66	719	359	370	349
48	1	Moderate	Left	0.486	0.534	0.437	502	251	282	220
49	1	Mild	Left	0.756	0.836	0.676	1018	509	515	503
50	1	Moderate	Left	0.624	0.679	0.57	593	296	299	294
51	1	Mild	Right	0.654	0.737	0.57	578	289	275	303
52	1	Moderate	Right	0.853	0.858	0.848	1136	568	571	565
53	1	Moderate	Left	0.626	0.714	0.537	847	423	483	364
54	1	Moderate	Left	0.377	0.435	0.319	233	116	151	82
55	1	Mild	Left	0.707	0.78	0.634	866	433	568	298
56	1	Mild	Left	0.702	0.728	0.677	610	305	270	340
57	1	Moderate	Left	0.496	0.518	0.475	678	339	325	353
58	1	Moderate	Left	0.623	0.726	0.52	727	363	357	370
59	1	Moderate	Left	0.813	0.835	0.791	2123	1061	1179	944
60	1	Moderate	Left	0.714	0.753	0.676	967	483	543	424
61	1	Mild	Left	0.618	0.601	0.636	896	448	430	466
62	1	Moderate	Right	0.724	0.656	0.793	706	353	314	392
63	1	Moderate	Right	0.712	0.747	0.678	1421	710	600	821
64	1	Moderate	Right	0.806	0.76	0.851	1133	566	600	533
65	1	Mild	Left	0.807	0.873	0.741	1074	537	554	520
66	1	Moderate	Right	0.652	0.697	0.608	944	472	334	610
67	1	Mild	Right	0.829	0.865	0.793	980	490	599	381
68	1	Severe	Left	0.624	0.637	0.612	671	335	327	344
69	1	Moderate	Right	0.663	0.566	0.76	772	386	274	498
70	1	Mild	Left	0.788	0.792	0.784	1302	651	637	665
71	1	Moderate	Right	0.805	0.8	0.81	1712	856	773	939
72	1	Mild	Left	0.715	0.747	0.683	822	411	502	320
73	1	Mild	Right	0.684	0.728	0.64	694	347	277	417
74	1	Severe	Right	0.674	0.741	0.606	858	429	469	389
75	1	Mild	Right	0.766	0.757	0.776	909	454	429	480
76	1	Mild	Right	0.792	0.78	0.803	947	473	384	563
77	1	Moderate	Right	0.74	0.704	0.776	904	452	330	574
78	1	Severe	Left	0.597	0.574	0.621	553	276	219	334
79	1	Moderate	Left	0.67	0.695	0.646	800	400	450	350
80	1	Moderate	Right	0.621	0.575	0.667	718	359	263	455
81	1	Mild	Left	0.676	0.696	0.657	638	319	430	208
82	1	Moderate	Left	0.615	0.706	0.524	941	470	582	359
83	1	Moderate	Right	0.806	0.79	0.823	1589	794	693	896
84	1	Mild	Right	0.871	0.921	0.822	1645	822	940	705
85	1	Moderate	Right	0.465	0.46	0.47	448	224	233	215
86	1	Moderate	Right	0.649	0.658	0.639	989	494	315	674
87	1	Severe	Left	0.583	0.592	0.575	1218	609	684	534
88	1	Moderate	Right	0.638	0.579	0.698	1085	542	540	545
89	1	Mild	Left	0.633	0.688	0.578	876	438	582	294
90	1	Moderate	Right	0.402	0.42	0.385	368	184	212	156
91	1	Moderate	Left	0.692	0.76	0.623	673	336	287	386
92	1	Moderate	Left	0.647	0.762	0.532	724	362	500	224
93	1	Moderate	Left	0.605	0.63	0.58	445	222	169	276
94	1	Severe	Left	0.621	0.747	0.495	875	437	469	406
95	1	Moderate	Right	0.498	0.47	0.525	924	462	407	517
96	1	Mild	Left	0.724	0.721	0.726	1050	525	593	457
97	1	Mild	Left	0.505	0.491	0.519	733	366	358	375
98	1	Severe	Left	0.356	0.411	0.3	641	320	375	266
99	1	Moderate	Right	0.707	0.689	0.725	730	365	352	378
100	1	Severe	Left	0.635	0.562	0.708	425	212	183	242
101	1	Moderate	Left	0.659	0.706	0.612	465	232	260	205
102	1	Mild	Right	0.712	0.71	0.714	1024	512	538	486
103	1	Moderate	Left	0.752	0.74	0.764	780	390	457	323
104	1	Moderate	Right	0.691	0.718	0.664	1719	859	945	774
105	1	Moderate	Left	0.73	0.739	0.722	858	429	421	437
106	1	Moderate	Left	0.563	0.574	0.552	1009	504	565	444
107	1	Mild	Left	0.506	0.516	0.495	1023	511	493	530
108	1	Moderate	Left	0.648	0.667	0.628	875	437	586	289
109	1	Mild	Left	0.747	0.799	0.695	1171	585	705	466
110	1	Moderate	Left	0.732	0.757	0.707	864	432	506	358
111	1	Mild	Left	0.65	0.632	0.667	1280	640	663	617
112	1	Mild	Right	0.744	0.774	0.715	1162	581	482	680
113	1	Moderate	Right	0.792	0.723	0.862	1060	530	305	755
114	1	Mild	Left	0.711	0.761	0.661	1664	832	825	839
115	1	Mild	Left	0.72	0.751	0.69	832	416	543	289
116	1	Severe	Right	0.565	0.625	0.505	779	389	525	254
117	1	Moderate	Left	0.582	0.652	0.512	930	465	510	420
118	1	Mild	Right	0.616	0.615	0.617	425	212	199	226
119	1	Moderate	Left	0.662	0.667	0.657	800	400	348	452
120	1	Moderate	Left	0.656	0.63	0.682	800	400	408	392
121	1	Severe	Left	0.622	0.609	0.636	637	318	237	400
122	1	Moderate	Right	0.616	0.619	0.613	1139	569	571	568
123	1	Moderate	Left	0.723	0.74	0.706	1769	884	874	895
124	1	Mild	Right	0.796	0.77	0.821	668	334	297	371
125	1	Mild	Right	0.534	0.557	0.512	489	244	284	205
126	1	Mild	Left	0.822	0.916	0.727	2013	1006	1023	990
127	1	Moderate	Left	0.842	0.849	0.836	1228	614	635	593
128	1	Moderate	Left	0.739	0.746	0.732	727	363	372	355
129	1	Moderate	Right	0.745	0.746	0.744	1017	508	513	504
130	1	Mild	Left	0.676	0.703	0.648	565	282	310	255
131	1	Mild	Left	0.738	0.674	0.802	884	442	393	491
132	1	Moderate	Left	0.538	0.546	0.531	636	318	333	303
133	1	Mild	Right	0.41	0.5	0.321	868	434	574	294
134	1	Mild	Right	0.794	0.781	0.807	1317	658	399	918
135	1	Mild	Left	0.626	0.735	0.518	983	491	576	407
136	1	Moderate	Right	0.752	0.812	0.693	931	465	396	535
137	1	Mild	Left	0.684	0.704	0.663	1266	633	517	749
138	1	Moderate	Left	0.711	0.682	0.74	829	414	447	382
139	1	Moderate	Left	0.632	0.615	0.648	1010	505	485	525
140	1	Severe	Right	0.424	0.449	0.4	612	306	329	283
141	1	Severe	Left	0.539	0.621	0.457	530	265	326	204
142	1	Severe	Right	0.446	0.468	0.425	427	213	112	315
143	1	Severe	Right	0.318	0.25	0.385	634	317	305	329
144	1	Severe	Left	0.457	0.409	0.505	408	204	194	214
145	1	Severe	Right	0.515	0.476	0.554	886	443	434	452
146	1	Severe	Right	0.683	0.549	0.817	976	488	478	498
147	1	Severe	Left	0.492	0.49	0.494	724	362	343	381
148	1	Severe	Left	0.504	0.399	0.61	532	266	238	294
149	1	Severe	Left	0.504	0.607	0.401	592	296	344	248
150	1	Severe	Left	0.358	0.215	0.5	458	229	141	317
151	0	Non	Non	0.569			790	395
152	0	Non	Non	0.401			585	292
153	0	Non	Non	0.761			2020	1010
154	0	Non	Non	0.591			689	344
155	0	Non	Non	0.792			885	442
156	0	Non	Non	0.688			1265	632
157	0	Non	Non	0.783			1063	531
158	0	Non	Non	0.726			1046	523
159	0	Non	Non	0.592			708	354
160	0	Non	Non	0.621			1048	524
161	0	Non	Non	0.756			1947	973
162	0	Non	Non	0.815			1287	643
163	0	Non	Non	0.677			743	371
164	0	Non	Non	0.643			842	421
165	0	Non	Non	0.532			844	422
166	0	Non	Non	0.608			800	400
167	0	Non	Non	0.814			1564	782
168	0	Non	Non	0.613			924	462
169	0	Non	Non	0.778			1024	512
170	0	Non	Non	0.738			1052	526
171	0	Non	Non	0.541			715	357
172	0	Non	Non	0.798			1110	555
173	0	Non	Non	0.545			651	325
174	0	Non	Non	0.752			1528	764
175	0	Non	Non	0.46			972	486
176	0	Non	Non	0.61			783	391
177	0	Non	Non	0.689			662	331
178	0	Non	Non	0.855			1242	621
179	0	Non	Non	0.685			1515	757
180	0	Non	Non	0.727			1440	720
181	0	Non	Non	0.794			1550	775
182	0	Non	Non	0.744			1042	521
183	0	Non	Non	0.606			826	413
184	0	Non	Non	0.593			991	495
185	0	Non	Non	0.568			792	396
186	0	Non	Non	0.865			1532	766
187	0	Non	Non	0.478			850	425
188	0	Non	Non	0.753			1249	624
189	0	Non	Non	0.774			1194	597
190	0	Non	Non	0.755			1490	745
191	0	Non	Non	0.707			700	350
192	0	Non	Non	0.903			1105	552
193	0	Non	Non	0.585			672	336
194	0	Non	Non	0.701			1391	695
195	0	Non	Non	0.756			1822	911
196	0	Non	Non	0.863			1200	600
197	0	Non	Non	0.503			824	412
198	0	Non	Non	0.751			1492	746
199	0	Non	Non	0.833			947	473
200	0	Non	Non	0.514			756	378
201	0	Non	Non	0.693			652	326
202	0	Non	Non	0.348			622	311
203	0	Non	Non	0.65			761	380
204	0	Non	Non	0.684			1162	581
205	0	Non	Non	0.556			737	368
206	0	Non	Non	0.704			955	477
207	0	Non	Non	0.5			719	359
208	0	Non	Non	0.693			1051	525
209	0	Non	Non	0.722			685	342
210	0	Non	Non	0.729			600	300
211	0	Non	Non	0.647			780	390
212	0	Non	Non	0.726			2289	1144
213	0	Non	Non	0.635			845	422
214	0	Non	Non	0.695			1102	551
215	0	Non	Non	0.804			1419	709
216	0	Non	Non	0.778			1569	784
217	0	Non	Non	0.824			1875	937
218	0	Non	Non	0.76			1076	538
219	0	Non	Non	0.687			980	490
220	0	Non	Non	0.551			592	296
221	0	Non	Non	0.635			1127	563
222	0	Non	Non	0.687			1349	674
223	0	Non	Non	0.509			729	364
224	0	Non	Non	0.765			1332	666
225	0	Non	Non	0.391			375	187
226	0	Non	Non	0.698			970	485
227	0	Non	Non	0.796			1175	587
228	0	Non	Non	0.707			1259	629
229	0	Non	Non	0.788			680	340
230	0	Non	Non	0.769			973	486
231	0	Non	Non	0.709			593	296
